# Supplementary material for: Pesticide Toxicity Footprints of Australian Dietary Choices
Source: MDPI journal article supplement (doi:10.3390/nu13124314), 2021-11-29
Supplement: s1 [file s1]

# Supplementary Material

Supplementary Table S1 Normalization and weighting factors

| Normalization model* | FE                    | HT-c               | HT-nc              |
|----------------------|-----------------------|--------------------|--------------------|
| Global               | $5.78 \times 10^{13}$ | $3.37 \times 10^5$ | $5.91 \times 10^6$ |
| EU27                 | $4.46 \times 10^{12}$ | $1.88 \times 10^4$ | $2.69 \times 10^5$ |
|                      |                       |                    |                    |
| Weighting model*     | FE                    | HT-c               | HT-nc              |
| Equal                | 0.33                  | 0.33               | 0.33               |
| EU policy            | 0.32                  | 0.36               | 0.32               |

\* See main text for details

**Supplementary Table S2 Environmental indicator values of individual foods**

| All data edible portion, uncooked          | FE      | HT-c                   | HT-nc                  | PTF   |
|--------------------------------------------|---------|------------------------|------------------------|-------|
|                                            | CTUe/kg | CTUh/kg                | CTUh/kg                | pt/kg |
| <b>LIVESTOCK PRODUCTS OTHER THAN DAIRY</b> |         |                        |                        |       |
| Egg                                        | 1.09    | $1.56 \times 10^{-9}$  | $7.04 \times 10^{-9}$  | 8.23  |
| Chicken meat                               | 2.41    | $2.28 \times 10^{-9}$  | $1.60 \times 10^{-8}$  | 17.08 |
| Chicken offal                              | 1.23    | $1.16 \times 10^{-9}$  | $8.13 \times 10^{-9}$  | 8.68  |
| Pig meat                                   | 3.52    | $2.98 \times 10^{-9}$  | $2.94 \times 10^{-8}$  | 24.91 |
| Pig offal                                  | 0.68    | $5.73 \times 10^{-10}$ | $5.66 \times 10^{-9}$  | 4.79  |
| Lamb meat                                  | 1.89    | $1.15 \times 10^{-9}$  | $1.28 \times 10^{-8}$  | 12.78 |
| Lamb offal                                 | 0.86    | $5.23 \times 10^{-10}$ | $5.80 \times 10^{-9}$  | 5.80  |
| Beef meat                                  | 1.57    | $1.65 \times 10^{-9}$  | $9.54 \times 10^{-9}$  | 11.24 |
| Beef offal                                 | 0.89    | $9.35 \times 10^{-10}$ | $5.42 \times 10^{-9}$  | 6.38  |
| Game meat                                  | 0.00    | 0.00                   | 0.00                   | 0.00  |
| Fish - wildcapture                         | 0.00    | 0.00                   | 0.00                   | 0.00  |
| Fish - farmed                              | 0.67    | $1.42 \times 10^{-9}$  | $1.04 \times 10^{-8}$  | 5.85  |
| Mussels                                    | 0.00    | 0.00                   | 0.00                   | 0.00  |
| Prawn - wildcapture                        | 0.00    | 0.00                   | 0.00                   | 0.00  |
| Octopus/squid                              | 0.00    | 0.00                   | 0.00                   | 0.00  |
| Lobster                                    | 0.00    | 0.00                   | 0.00                   | 0.00  |
| Beef sausage                               | 1.26    | $1.35 \times 10^{-9}$  | $8.16 \times 10^{-9}$  | 9.04  |
| Processed pig meat                         | 3.52    | $2.98 \times 10^{-9}$  | $2.94 \times 10^{-8}$  | 24.91 |
| Pork sausage                               | 2.72    | $2.35 \times 10^{-9}$  | $2.31 \times 10^{-8}$  | 19.29 |
| Lamb sausage                               | 1.50    | $9.79 \times 10^{-10}$ | $1.06 \times 10^{-8}$  | 10.20 |
| Processed chicken meat                     | 2.41    | $2.28 \times 10^{-9}$  | $1.60 \times 10^{-8}$  | 17.08 |
| Processed beef                             | 1.57    | $1.65 \times 10^{-9}$  | $9.54 \times 10^{-9}$  | 11.24 |
| Processed lamb                             | 1.89    | $1.15 \times 10^{-9}$  | $1.28 \times 10^{-8}$  | 12.78 |
| Chicken sausage                            | 1.89    | $1.83 \times 10^{-9}$  | $1.30 \times 10^{-8}$  | 13.42 |
|                                            |         |                        |                        |       |
| <b>DAIRY FOODS</b>                         |         |                        |                        |       |
| Whole milk                                 | 0.31    | $2.98 \times 10^{-10}$ | $1.35 \times 10^{-9}$  | 2.14  |
| Cheese                                     | 1.56    | $1.52 \times 10^{-9}$  | $6.88 \times 10^{-9}$  | 10.91 |
| Butter                                     | 2.08    | $2.03 \times 10^{-9}$  | $9.18 \times 10^{-9}$  | 14.55 |
| Cream                                      | 1.17    | $1.13 \times 10^{-9}$  | $5.13 \times 10^{-9}$  | 8.13  |
| Skim milk                                  | 0.21    | $2.09 \times 10^{-10}$ | $9.45 \times 10^{-10}$ | 1.50  |
| Yogurt (sugar, no fruit)                   | 0.40    | $3.08 \times 10^{-10}$ | $1.40 \times 10^{-9}$  | 2.66  |
| Yogurt (no sugar, no fruit)                | 0.34    | $3.28 \times 10^{-10}$ | $1.48 \times 10^{-9}$  | 2.35  |
| Ice-cream (sugar, plain)                   | 0.65    | $4.66 \times 10^{-10}$ | $2.12 \times 10^{-9}$  | 4.34  |
| Milk, chocolate flavour                    | 0.45    | $2.81 \times 10^{-10}$ | $1.28 \times 10^{-9}$  | 2.96  |
| Milk, iced coffee flavour                  | 0.43    | $2.82 \times 10^{-10}$ | $1.28 \times 10^{-9}$  | 2.85  |
| Milk, other flavour                        | 0.36    | $2.83 \times 10^{-10}$ | $1.28 \times 10^{-9}$  | 2.41  |
| Milk powder                                | 2.39    | $2.32 \times 10^{-9}$  | $1.05 \times 10^{-8}$  | 16.68 |
| Condensed milk                             | 1.14    | $4.08 \times 10^{-10}$ | $1.87 \times 10^{-9}$  | 7.09  |
| Custard                                    | 0.42    | $3.69 \times 10^{-10}$ | $1.32 \times 10^{-9}$  | 2.89  |
|                                            |         |                        |                        |       |
| <b>SWEETENERS</b>                          |         |                        |                        |       |
| Sugar-refined                              | 1.30    | $4.31 \times 10^{-12}$ | $5.80 \times 10^{-11}$ | 7.52  |

|                                          |       |                        |                        |        |
|------------------------------------------|-------|------------------------|------------------------|--------|
| Molasses                                 | 0.27  | $8.88 \times 10^{-13}$ | $1.19 \times 10^{-11}$ | 1.55   |
| Honey                                    | 0.00  | 0.00                   | 0.00                   | 0.00   |
|                                          |       |                        |                        |        |
| <b>VEGETABLES</b>                        |       |                        |                        |        |
| Potato                                   | 0.37  | $2.93 \times 10^{-10}$ | $9.11 \times 10^{-10}$ | 2.46   |
| Onion                                    | 0.39  | $3.11 \times 10^{-10}$ | $9.68 \times 10^{-10}$ | 2.62   |
| Garlic                                   | 0.38  | $3.00 \times 10^{-10}$ | $9.33 \times 10^{-10}$ | 2.52   |
| Beetroot                                 | 0.45  | $3.61 \times 10^{-10}$ | $1.12 \times 10^{-9}$  | 3.03   |
| Carrot                                   | 0.41  | $3.23 \times 10^{-10}$ | $1.01 \times 10^{-9}$  | 2.72   |
| Swede                                    | 0.35  | $2.80 \times 10^{-10}$ | $8.70 \times 10^{-10}$ | 2.35   |
| Tomato salad (passive production system) | 0.32  | $2.52 \times 10^{-10}$ | $7.82 \times 10^{-10}$ | 2.12   |
| Celery                                   | 0.48  | $3.83 \times 10^{-10}$ | $1.19 \times 10^{-9}$  | 3.22   |
| Zucchini                                 | 0.34  | $2.68 \times 10^{-10}$ | $8.32 \times 10^{-10}$ | 2.25   |
| Squash                                   | 0.33  | $2.62 \times 10^{-10}$ | $8.15 \times 10^{-10}$ | 2.20   |
| Cucumber                                 | 0.32  | $2.57 \times 10^{-10}$ | $7.98 \times 10^{-10}$ | 2.16   |
| Pumpkin                                  | 0.39  | $3.11 \times 10^{-10}$ | $9.68 \times 10^{-10}$ | 2.62   |
| Mushroom                                 | 0.31  | $2.49 \times 10^{-10}$ | $7.74 \times 10^{-10}$ | 2.09   |
| Beans - green                            | 0.39  | $3.11 \times 10^{-10}$ | $9.68 \times 10^{-10}$ | 2.62   |
| Cauliflower                              | 0.52  | $4.15 \times 10^{-10}$ | $1.29 \times 10^{-9}$  | 3.49   |
| Broccoli                                 | 0.52  | $4.15 \times 10^{-10}$ | $1.29 \times 10^{-9}$  | 3.49   |
| Cabbage                                  | 0.39  | $3.11 \times 10^{-10}$ | $9.68 \times 10^{-10}$ | 2.62   |
| Snowpea                                  | 0.39  | $3.11 \times 10^{-10}$ | $9.68 \times 10^{-10}$ | 2.62   |
| Peas (no pod)                            | 0.49  | $3.89 \times 10^{-10}$ | $1.21 \times 10^{-9}$  | 3.27   |
| Spinach and other leafy greens           | 0.42  | $3.36 \times 10^{-10}$ | $1.05 \times 10^{-9}$  | 2.83   |
| Lettuce and other salad leaves           | 0.45  | $3.56 \times 10^{-10}$ | $1.11 \times 10^{-9}$  | 2.99   |
| Ginger                                   | 0.33  | $2.65 \times 10^{-10}$ | $8.23 \times 10^{-10}$ | 2.23   |
| Asparagus                                | 0.38  | $3.00 \times 10^{-10}$ | $9.33 \times 10^{-10}$ | 2.52   |
| Capsicum and peppers                     | 0.39  | $3.11 \times 10^{-10}$ | $9.68 \times 10^{-10}$ | 2.62   |
| Avocado                                  | 30.64 | $4.24 \times 10^{-10}$ | $1.29 \times 10^{-9}$  | 177.21 |
| Sweet corn                               | 0.60  | $4.79 \times 10^{-10}$ | $1.49 \times 10^{-9}$  | 4.03   |
| Fennel                                   | 0.56  | $4.45 \times 10^{-10}$ | $1.38 \times 10^{-9}$  | 3.74   |
|                                          |       |                        |                        |        |
| <b>FRUITS</b>                            |       |                        |                        |        |
| Orange, fresh                            | 13.64 | $8.68 \times 10^{-10}$ | $5.82 \times 10^{-9}$  | 79.85  |
| Lemon, fresh                             | 15.91 | $1.01 \times 10^{-9}$  | $6.79 \times 10^{-9}$  | 93.16  |
| Lime, fresh                              | 15.00 | $9.54 \times 10^{-10}$ | $6.40 \times 10^{-9}$  | 87.83  |
| Grapefruit, fresh                        | 15.22 | $9.68 \times 10^{-10}$ | $6.49 \times 10^{-9}$  | 89.11  |
| Mandarin, fresh                          | 13.82 | $8.79 \times 10^{-10}$ | $5.89 \times 10^{-9}$  | 80.90  |
| Apple, fresh                             | 0.53  | $1.04 \times 10^{-10}$ | $5.85 \times 10^{-9}$  | 3.51   |
| Pear, fresh                              | 0.56  | $1.09 \times 10^{-10}$ | $6.11 \times 10^{-9}$  | 3.67   |
| Quince, fresh                            | 0.57  | $1.12 \times 10^{-10}$ | $6.26 \times 10^{-9}$  | 3.75   |
| Grape, fresh                             | 2.29  | $1.72 \times 10^{-11}$ | $1.68 \times 10^{-8}$  | 14.15  |
| Watermelon, fresh                        | 0.61  | $4.88 \times 10^{-10}$ | $1.52 \times 10^{-9}$  | 4.11   |
| Rockmelon, fresh                         | 0.50  | $3.95 \times 10^{-10}$ | $1.23 \times 10^{-9}$  | 3.32   |
| Honey dew melon, fresh                   | 0.50  | $4.02 \times 10^{-10}$ | $1.25 \times 10^{-9}$  | 3.38   |
| Apricot, fresh                           | 7.28  | $3.43 \times 10^{-10}$ | $9.68 \times 10^{-8}$  | 47.78  |
| Peach, fresh                             | 7.60  | $3.58 \times 10^{-10}$ | $1.01 \times 10^{-7}$  | 49.90  |
| Nectarine, fresh                         | 7.44  | $3.50 \times 10^{-10}$ | $9.89 \times 10^{-8}$  | 48.82  |

|                         |       |                        |                        |        |
|-------------------------|-------|------------------------|------------------------|--------|
| Cherry, fresh           | 8.05  | $3.79 \times 10^{-10}$ | $1.07 \times 10^{-7}$  | 52.84  |
| Kiwi, fresh             | 9.12  | $4.29 \times 10^{-10}$ | $1.21 \times 10^{-7}$  | 59.88  |
| Pineapple, fresh        | 4.88  | $1.51 \times 10^{-10}$ | $1.43 \times 10^{-10}$ | 28.29  |
| Banana, fresh           | 5.03  | $1.55 \times 10^{-10}$ | $1.48 \times 10^{-10}$ | 29.16  |
| Strawberry, fresh       | 7.05  | $3.32 \times 10^{-10}$ | $9.38 \times 10^{-8}$  | 46.30  |
| Raspberry, fresh        | 6.84  | $3.22 \times 10^{-10}$ | $9.10 \times 10^{-8}$  | 44.91  |
| Cranberry, fresh        | 6.84  | $3.22 \times 10^{-10}$ | $9.10 \times 10^{-8}$  | 44.91  |
| Blueberry, fresh        | 6.84  | $3.22 \times 10^{-10}$ | $9.10 \times 10^{-8}$  | 44.91  |
| Olive, fresh            | 8.55  | $4.03 \times 10^{-10}$ | $1.14 \times 10^{-7}$  | 56.14  |
| Mango, fresh            | 32.45 | $4.49 \times 10^{-10}$ | $1.36 \times 10^{-9}$  | 187.63 |
|                         |       |                        |                        |        |
| <b>VEGETABLE OILS</b>   |       |                        |                        |        |
| Canola oil              | 4.77  | $3.04 \times 10^{-9}$  | $1.95 \times 10^{-8}$  | 31.60  |
| Soybean oil             | 1.30  | $2.51 \times 10^{-9}$  | $1.32 \times 10^{-9}$  | 10.04  |
| Sesame oil              | 9.38  | $3.30 \times 10^{-9}$  | $4.00 \times 10^{-8}$  | 59.64  |
| Olive oil               | 32.84 | $1.55 \times 10^{-9}$  | $4.37 \times 10^{-7}$  | 215.57 |
| Peanut oil              | 1.25  | $2.41 \times 10^{-9}$  | $1.26 \times 10^{-9}$  | 9.64   |
| Sunflower oil           | 7.97  | $2.81 \times 10^{-9}$  | $3.40 \times 10^{-8}$  | 50.67  |
| Palm oil                | 20.57 | $2.44 \times 10^{-9}$  | $1.09 \times 10^{-8}$  | 121.64 |
|                         |       |                        |                        |        |
| <b>NUTS</b>             |       |                        |                        |        |
| Other nuts              | 39.33 | $6.17 \times 10^{-9}$  | $1.50 \times 10^{-7}$  | 241.41 |
| Almond                  | 60.45 | $9.48 \times 10^{-9}$  | $2.31 \times 10^{-7}$  | 371.02 |
| Peanut                  | 0.94  | $1.82 \times 10^{-9}$  | $9.55 \times 10^{-10}$ | 7.28   |
|                         |       |                        |                        |        |
| <b>SEEDS</b>            |       |                        |                        |        |
| Sesame seed             | 4.04  | $1.42 \times 10^{-9}$  | $1.72 \times 10^{-8}$  | 25.65  |
| Other seeds             | 4.04  | $1.42 \times 10^{-9}$  | $1.72 \times 10^{-8}$  | 25.65  |
|                         |       |                        |                        |        |
| <b>GRAINS</b>           |       |                        |                        |        |
| Brown rice              | 0.06  | $1.99 \times 10^{-10}$ | $1.55 \times 10^{-8}$  | 1.44   |
| White rice              | 0.07  | $2.27 \times 10^{-10}$ | $1.77 \times 10^{-8}$  | 1.64   |
| Rice flour              | 0.07  | $2.27 \times 10^{-10}$ | $1.77 \times 10^{-8}$  | 1.64   |
| Rice bran               | 0.04  | $1.13 \times 10^{-10}$ | $8.86 \times 10^{-9}$  | 0.82   |
| Barley                  | 0.26  | $4.93 \times 10^{-10}$ | $4.85 \times 10^{-9}$  | 2.24   |
| Corn flour              | 1.46  | $2.07 \times 10^{-9}$  | $2.36 \times 10^{-9}$  | 10.61  |
| Oats                    | 0.26  | $5.08 \times 10^{-10}$ | $4.99 \times 10^{-9}$  | 2.30   |
| Wholemeal wheat flour   | 0.22  | $4.20 \times 10^{-10}$ | $4.13 \times 10^{-9}$  | 1.91   |
| Refined wheat flour     | 0.20  | $3.92 \times 10^{-10}$ | $3.85 \times 10^{-9}$  | 1.78   |
| Wheat bran              | 0.27  | $5.10 \times 10^{-10}$ | $5.01 \times 10^{-9}$  | 2.32   |
| Wheat germ              | 0.55  | $1.06 \times 10^{-9}$  | $1.04 \times 10^{-8}$  | 4.81   |
|                         |       |                        |                        |        |
| <b>PULSES/BEANS</b>     |       |                        |                        |        |
| Chickpea soaked         | 1.72  | $1.74 \times 10^{-10}$ | $1.29 \times 10^{-8}$  | 10.82  |
| Lentil soaked           | 1.72  | $1.74 \times 10^{-10}$ | $1.29 \times 10^{-8}$  | 10.82  |
| Tofu                    | 0.14  | $2.80 \times 10^{-10}$ | $1.47 \times 10^{-10}$ | 1.12   |
|                         |       |                        |                        |        |
| <b>TEA &amp; COFFEE</b> |       |                        |                        |        |

|                              |       |                        |                        |        |
|------------------------------|-------|------------------------|------------------------|--------|
| Tea (dried)                  | 0.51  | $8.31 \times 10^{-13}$ | $2.93 \times 10^{-10}$ | 2.95   |
| Coffee bean (roasted)        | 15.50 | $1.20 \times 10^{-10}$ | $3.48 \times 10^{-10}$ | 89.52  |
| Coffee instant               | 31.00 | $2.40 \times 10^{-10}$ | $6.95 \times 10^{-10}$ | 179.04 |
|                              |       |                        |                        |        |
| <b>COCOA PRODUCTS</b>        |       |                        |                        |        |
| Cocoa powder                 | 9.97  | $6.54 \times 10^{-11}$ | $3.87 \times 10^{-10}$ | 57.57  |
| Cocoa paste                  | 18.87 | $1.24 \times 10^{-10}$ | $7.33 \times 10^{-10}$ | 108.96 |
| Milk Chocolate               | 6.84  | $5.99 \times 10^{-10}$ | $2.78 \times 10^{-9}$  | 40.17  |
|                              |       |                        |                        |        |
| <b>SPREADS</b>               |       |                        |                        |        |
| Margarine                    | 3.58  | $1.94 \times 10^{-9}$  | $1.49 \times 10^{-8}$  | 23.40  |
| Hazelnut spread              | 8.40  | $1.12 \times 10^{-9}$  | $5.46 \times 10^{-9}$  | 49.84  |
| Jam-strawberry               | 3.34  | $1.35 \times 10^{-10}$ | $3.75 \times 10^{-8}$  | 21.53  |
| Jam-raspberry                | 3.26  | $1.31 \times 10^{-10}$ | $3.64 \times 10^{-8}$  | 20.97  |
| Jam -apricot                 | 3.43  | $1.39 \times 10^{-10}$ | $3.87 \times 10^{-8}$  | 22.12  |
|                              |       |                        |                        |        |
| <b>DRIED FRUIT</b>           |       |                        |                        |        |
| Sultata                      | 10.75 | $8.09 \times 10^{-11}$ | $7.90 \times 10^{-8}$  | 66.51  |
| Dried apricot                | 37.85 | $1.78 \times 10^{-9}$  | $5.03 \times 10^{-7}$  | 248.44 |
|                              |       |                        |                        |        |
| <b>PROCESSED FRUITS</b>      |       |                        |                        |        |
| Pear, processed              | 0.56  | $1.09 \times 10^{-10}$ | $6.11 \times 10^{-9}$  | 3.67   |
| Apricot, processed           | 7.28  | $3.43 \times 10^{-10}$ | $9.68 \times 10^{-8}$  | 47.78  |
| Peach, processed             | 7.60  | $3.58 \times 10^{-10}$ | $1.01 \times 10^{-7}$  | 49.90  |
| Pineapple, processed         | 4.88  | $1.51 \times 10^{-10}$ | $1.43 \times 10^{-10}$ | 28.29  |
| Blueberry, processed         | 6.84  | $3.22 \times 10^{-10}$ | $9.10 \times 10^{-8}$  | 44.91  |
| Raspberry, processed         | 6.84  | $3.22 \times 10^{-10}$ | $9.10 \times 10^{-8}$  | 44.91  |
|                              |       |                        |                        |        |
| <b>FRUIT JUICE</b>           |       |                        |                        |        |
| Grape juice                  | 2.95  | $2.22 \times 10^{-11}$ | $2.17 \times 10^{-8}$  | 18.26  |
| Orange juice                 | 18.90 | $1.20 \times 10^{-9}$  | $8.06 \times 10^{-9}$  | 110.67 |
| Apple juice                  | 0.76  | $1.48 \times 10^{-10}$ | $8.29 \times 10^{-9}$  | 4.97   |
| Blackcurrant juice           | 13.68 | $6.44 \times 10^{-10}$ | $1.82 \times 10^{-7}$  | 89.82  |
| Pineapple juice              | 16.34 | $5.05 \times 10^{-10}$ | $4.80 \times 10^{-10}$ | 94.78  |
| Lemon juice                  | 26.26 | $1.67 \times 10^{-9}$  | $1.12 \times 10^{-8}$  | 153.71 |
| Grapefruit juice             | 21.01 | $1.34 \times 10^{-9}$  | $8.96 \times 10^{-9}$  | 122.97 |
|                              |       |                        |                        |        |
| <b>COCONUT PRODUCTS</b>      |       |                        |                        |        |
| Coconut dessicated           | 53.49 | $6.34 \times 10^{-9}$  | $2.84 \times 10^{-8}$  | 316.33 |
| Coconut water                | 11.72 | $1.39 \times 10^{-9}$  | $6.22 \times 10^{-9}$  | 69.32  |
| Coconut milk                 | 12.21 | $1.45 \times 10^{-9}$  | $6.48 \times 10^{-9}$  | 72.21  |
| Coconut cream                | 24.42 | $2.90 \times 10^{-9}$  | $1.30 \times 10^{-8}$  | 144.42 |
|                              |       |                        |                        |        |
| <b>PROCESSED VEGETABLES</b>  |       |                        |                        |        |
| Processed potato             | 0.37  | $2.93 \times 10^{-10}$ | $9.11 \times 10^{-10}$ | 2.46   |
| Processed beetroot           | 0.45  | $3.61 \times 10^{-10}$ | $1.12 \times 10^{-9}$  | 3.03   |
| Processed tomato whole/diced | 0.32  | $2.52 \times 10^{-10}$ | $7.82 \times 10^{-10}$ | 2.12   |
| Processed mushroom           | 0.31  | $2.49 \times 10^{-10}$ | $7.74 \times 10^{-10}$ | 2.09   |

|                                                           |       |                        |                        |       |
|-----------------------------------------------------------|-------|------------------------|------------------------|-------|
| Processed beans-green                                     | 0.39  | $3.11 \times 10^{-10}$ | $9.68 \times 10^{-10}$ | 2.62  |
| Processed pea (no pods)                                   | 0.49  | $3.89 \times 10^{-10}$ | $1.21 \times 10^{-9}$  | 3.27  |
| Processed spinach                                         | 0.42  | $3.36 \times 10^{-10}$ | $1.05 \times 10^{-9}$  | 2.83  |
| Processed asparagus                                       | 0.38  | $3.00 \times 10^{-10}$ | $9.33 \times 10^{-10}$ | 2.52  |
| Processed corn kernal                                     | 0.60  | $4.79 \times 10^{-10}$ | $1.49 \times 10^{-9}$  | 4.03  |
|                                                           |       |                        |                        |       |
| <b>VEGETABLE JUICE/PUREE/PASTE</b>                        |       |                        |                        |       |
| Vegetable juice                                           | 0.63  | $4.98 \times 10^{-10}$ | $1.55 \times 10^{-9}$  | 4.19  |
| Tomato juice                                              | 0.39  | $3.11 \times 10^{-10}$ | $9.68 \times 10^{-10}$ | 2.62  |
| Tomato puree                                              | 0.39  | $3.11 \times 10^{-10}$ | $9.68 \times 10^{-10}$ | 2.62  |
| Tomato paste                                              | 1.25  | $9.96 \times 10^{-10}$ | $3.10 \times 10^{-9}$  | 8.38  |
|                                                           |       |                        |                        |       |
| <b>SAUCES/DRESSINGS</b>                                   |       |                        |                        |       |
| Balsamic vinegar                                          | 0.29  | $2.22 \times 10^{-12}$ | $2.17 \times 10^{-9}$  | 1.83  |
| Soy sauce                                                 | 0.14  | $2.66 \times 10^{-10}$ | $1.39 \times 10^{-10}$ | 1.06  |
| Mayonnaise                                                | 5.37  | $1.90 \times 10^{-9}$  | $2.24 \times 10^{-8}$  | 34.10 |
| Tomato sauce                                              | 0.59  | $2.44 \times 10^{-10}$ | $7.67 \times 10^{-10}$ | 3.70  |
| Barbecue sauce                                            | 0.80  | $1.73 \times 10^{-10}$ | $5.58 \times 10^{-10}$ | 4.83  |
|                                                           |       |                        |                        |       |
| <b>BAKED FOODS</b>                                        |       |                        |                        |       |
| White bread                                               | 0.14  | $2.74 \times 10^{-10}$ | $2.70 \times 10^{-9}$  | 1.25  |
| Wholemeal bread                                           | 0.15  | $2.94 \times 10^{-10}$ | $2.89 \times 10^{-9}$  | 1.34  |
| Crispbread-wholegrain                                     | 0.67  | $5.83 \times 10^{-10}$ | $5.46 \times 10^{-9}$  | 4.73  |
| Crispbread-plain                                          | 0.50  | $5.53 \times 10^{-10}$ | $4.75 \times 10^{-9}$  | 3.72  |
| Biscuit-sweet-plain                                       | 0.95  | $5.94 \times 10^{-10}$ | $4.68 \times 10^{-9}$  | 6.36  |
| Biscuit-choc crème and coated                             | 3.50  | $6.77 \times 10^{-10}$ | $4.30 \times 10^{-9}$  | 21.11 |
| Croissant                                                 | 0.67  | $7.48 \times 10^{-10}$ | $4.92 \times 10^{-9}$  | 4.90  |
| Cake -Madiera type                                        | 1.31  | $8.72 \times 10^{-10}$ | $5.47 \times 10^{-9}$  | 8.71  |
| Crème biscuit                                             | 1.57  | $7.10 \times 10^{-10}$ | $5.10 \times 10^{-9}$  | 10.06 |
| Oat biscuit                                               | 5.17  | $1.09 \times 10^{-9}$  | $6.30 \times 10^{-9}$  | 31.27 |
| Cone for ice-cream                                        | 0.97  | $6.99 \times 10^{-10}$ | $4.07 \times 10^{-9}$  | 6.53  |
| Water cracker                                             | 0.75  | $7.09 \times 10^{-10}$ | $5.73 \times 10^{-9}$  | 5.36  |
| Rice cracker                                              | 0.21  | $3.11 \times 10^{-10}$ | $1.78 \times 10^{-8}$  | 2.54  |
| Corn cake                                                 | 1.50  | $2.08 \times 10^{-9}$  | $2.53 \times 10^{-9}$  | 10.82 |
| Museli bar: nuts & seeds                                  | 5.08  | $1.50 \times 10^{-9}$  | $2.20 \times 10^{-8}$  | 32.01 |
| Museli Bar: fruit & nut                                   | 10.31 | $1.61 \times 10^{-9}$  | $9.15 \times 10^{-8}$  | 66.21 |
| Museli bar: nuts & seeds/choc coat                        | 5.43  | $1.32 \times 10^{-9}$  | $1.81 \times 10^{-8}$  | 33.64 |
| Iced doughnut                                             | 1.04  | $6.82 \times 10^{-10}$ | $5.09 \times 10^{-9}$  | 6.94  |
| Cake, fruit, commercial, uniced                           | 4.70  | $8.06 \times 10^{-10}$ | $3.25 \times 10^{-8}$  | 29.74 |
| Cake, lamington, unfilled                                 | 5.82  | $1.08 \times 10^{-9}$  | $5.88 \times 10^{-9}$  | 34.95 |
| Cake or cupcake, chocolate, commercial, sugar based icing | 1.77  | $6.46 \times 10^{-10}$ | $4.02 \times 10^{-9}$  | 11.05 |
| Muffin, cake-style, berry, commercial, uniced             | 2.26  | $9.10 \times 10^{-10}$ | $1.81 \times 10^{-8}$  | 14.96 |
|                                                           |       |                        |                        |       |
| <b>PASTA</b>                                              |       |                        |                        |       |
| Pasta                                                     | 0.20  | $3.92 \times 10^{-10}$ | $3.85 \times 10^{-9}$  | 1.78  |
|                                                           |       |                        |                        |       |
| <b>BEVERAGES</b>                                          |       |                        |                        |       |

|                                             |      |                        |                        |       |
|---------------------------------------------|------|------------------------|------------------------|-------|
| Tap water                                   | 0.00 | 0.00                   | 0.00                   | 0.00  |
| Bottled water                               | 0.00 | 0.00                   | 0.00                   | 0.00  |
| Soft drink (sugar sweetened)                | 0.14 | $4.75 \times 10^{-13}$ | $6.38 \times 10^{-12}$ | 0.83  |
| Sports drink                                | 0.09 | $3.02 \times 10^{-13}$ | $4.06 \times 10^{-12}$ | 0.53  |
| Soft drink (artificial sweetener)           | 0.00 | 0.00                   | 0.00                   | 0.00  |
| Rice beverage                               | 0.03 | $4.70 \times 10^{-11}$ | $2.58 \times 10^{-9}$  | 0.39  |
| Almond beverage                             | 0.58 | $1.02 \times 10^{-10}$ | $2.22 \times 10^{-9}$  | 3.56  |
| Soy beverage                                | 0.08 | $9.29 \times 10^{-11}$ | $2.28 \times 10^{-10}$ | 0.57  |
| Chocolate and malt powder (as powder)       | 2.50 | $7.65 \times 10^{-10}$ | $6.98 \times 10^{-9}$  | 15.57 |
| Cordial - conc - not juice based            | 0.52 | $1.73 \times 10^{-12}$ | $2.33 \times 10^{-11}$ | 3.02  |
| Cordial - conc - juice based                | 6.60 | $3.23 \times 10^{-10}$ | $1.81 \times 10^{-9}$  | 38.50 |
|                                             |      |                        |                        |       |
| <b>SNACKS</b>                               |      |                        |                        |       |
| Popcorn                                     | 2.93 | $2.32 \times 10^{-9}$  | $9.68 \times 10^{-9}$  | 19.77 |
| Extruded cheese snack                       | 1.80 | $1.66 \times 10^{-9}$  | $1.22 \times 10^{-8}$  | 12.70 |
| Potato chips (crisps)                       | 3.09 | $2.17 \times 10^{-9}$  | $1.06 \times 10^{-8}$  | 20.57 |
| Cornchips                                   | 2.35 | $2.33 \times 10^{-9}$  | $6.98 \times 10^{-9}$  | 16.26 |
|                                             |      |                        |                        |       |
| <b>CONFECTIONARY</b>                        |      |                        |                        |       |
| Lolly (jube type)                           | 0.72 | $5.81 \times 10^{-10}$ | $1.34 \times 10^{-9}$  | 4.81  |
| Licorice                                    | 0.56 | $1.19 \times 10^{-10}$ | $1.18 \times 10^{-9}$  | 3.40  |
|                                             |      |                        |                        |       |
| <b>BREAKFAST CEREALS</b>                    |      |                        |                        |       |
| Muesli, natural with dried fruit (nut free) | 5.08 | $6.09 \times 10^{-10}$ | $6.24 \times 10^{-8}$  | 33.42 |
| Wheat biscuit                               | 0.24 | $3.94 \times 10^{-10}$ | $3.87 \times 10^{-9}$  | 2.01  |
| Oat cluster fruit                           | 1.17 | $6.18 \times 10^{-10}$ | $8.37 \times 10^{-9}$  | 7.84  |
| Oat cluster nut                             | 4.12 | $1.17 \times 10^{-9}$  | $1.78 \times 10^{-8}$  | 25.93 |
| Puffed rice                                 | 0.17 | $1.81 \times 10^{-10}$ | $1.41 \times 10^{-8}$  | 1.98  |
| Cornflake                                   | 1.94 | $2.57 \times 10^{-9}$  | $2.94 \times 10^{-9}$  | 13.88 |
| Puffed rice with chocolate                  | 0.88 | $6.20 \times 10^{-12}$ | $1.92 \times 10^{-10}$ | 5.10  |
| Cornflake, frosted                          | 1.70 | $1.61 \times 10^{-9}$  | $1.86 \times 10^{-9}$  | 11.50 |
| Commercial mixed grain/dried fruit/sugar    | 1.60 | $8.04 \times 10^{-10}$ | $9.25 \times 10^{-9}$  | 10.55 |
|                                             |      |                        |                        |       |
| <b>POTATO CHIPS - FRENCH FRIES</b>          |      |                        |                        |       |
| Potato chips - oven fry - basic             | 0.57 | $4.25 \times 10^{-10}$ | $1.76 \times 10^{-9}$  | 3.81  |
| Potato chips - oven fry - coated            | 0.61 | $4.94 \times 10^{-10}$ | $1.81 \times 10^{-9}$  | 4.13  |
|                                             |      |                        |                        |       |
| <b>PIES &amp; PASTRIES</b>                  |      |                        |                        |       |
| Pastry                                      | 0.97 | $7.26 \times 10^{-10}$ | $5.66 \times 10^{-9}$  | 6.61  |
| Meat pie                                    | 0.94 | $8.58 \times 10^{-10}$ | $5.31 \times 10^{-9}$  | 6.54  |
| Apple pie                                   | 0.98 | $3.32 \times 10^{-10}$ | $5.49 \times 10^{-9}$  | 6.26  |
| Quiche lorrienne                            | 1.31 | $1.24 \times 10^{-9}$  | $8.19 \times 10^{-9}$  | 9.24  |
| Danish Custard                              | 0.79 | $6.14 \times 10^{-10}$ | $3.79 \times 10^{-9}$  | 5.38  |
| Pasty, filled with vegetables & meat        | 0.92 | $7.15 \times 10^{-10}$ | $4.53 \times 10^{-9}$  | 6.26  |
|                                             |      |                        |                        |       |
| <b>ALCOHOLIC BEVERAGES</b>                  |      |                        |                        |       |
| Wine                                        | 3.19 | $2.40 \times 10^{-11}$ | $2.34 \times 10^{-8}$  | 19.73 |
| Beer                                        | 0.07 | $1.28 \times 10^{-10}$ | $1.25 \times 10^{-9}$  | 0.58  |

|              |      |                        |                        |      |
|--------------|------|------------------------|------------------------|------|
| Apple cider  | 0.76 | $1.48 \times 10^{-10}$ | $8.29 \times 10^{-9}$  | 4.97 |
| Spirit (rum) | 0.29 | $9.68 \times 10^{-13}$ | $1.30 \times 10^{-11}$ | 1.69 |

Freshwater ecotoxicity (FE); Human toxicity carcinogenic effects (HT-c), Human toxicity non-carcinogenic effects (HT-nc), Pesticide toxicity footprint (PTF)



## Supplementary Figure S1 Environmental indicator results for Australian adult daily diets

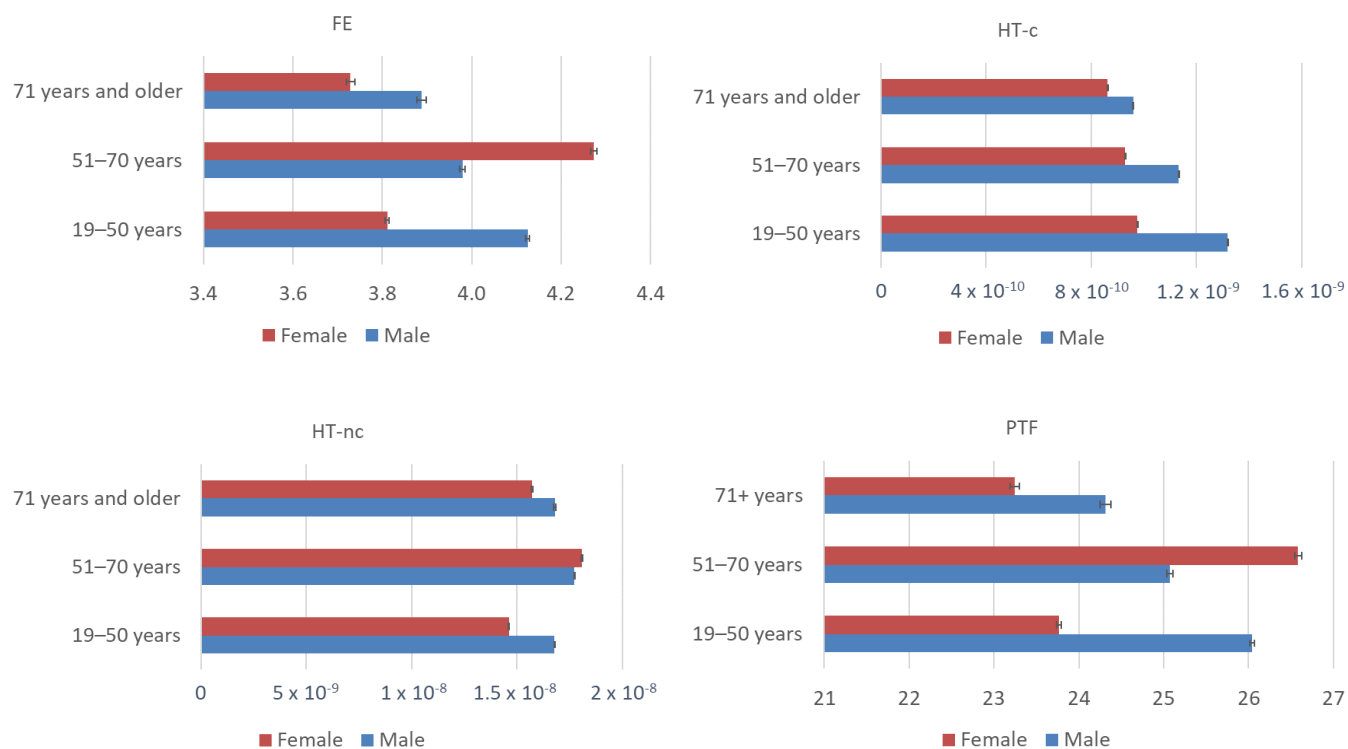

Freshwater ecotoxicity (FE, CTUe/person/day); Human toxicity carcinogenic effects (HT-c, CTUh/person/day), Human toxicity non-carcinogenic effects (HT-nc, CTUh/person/day), Pesticide toxicity footprint (PTF, points/person/day)
